# Supplementary material
Source: PubMed Central journal article supplement (PMC6744995)
Supplement: NIHMS1533544-supplement-1.pdf [file NIHMS1533544-supplement-1.pdf]

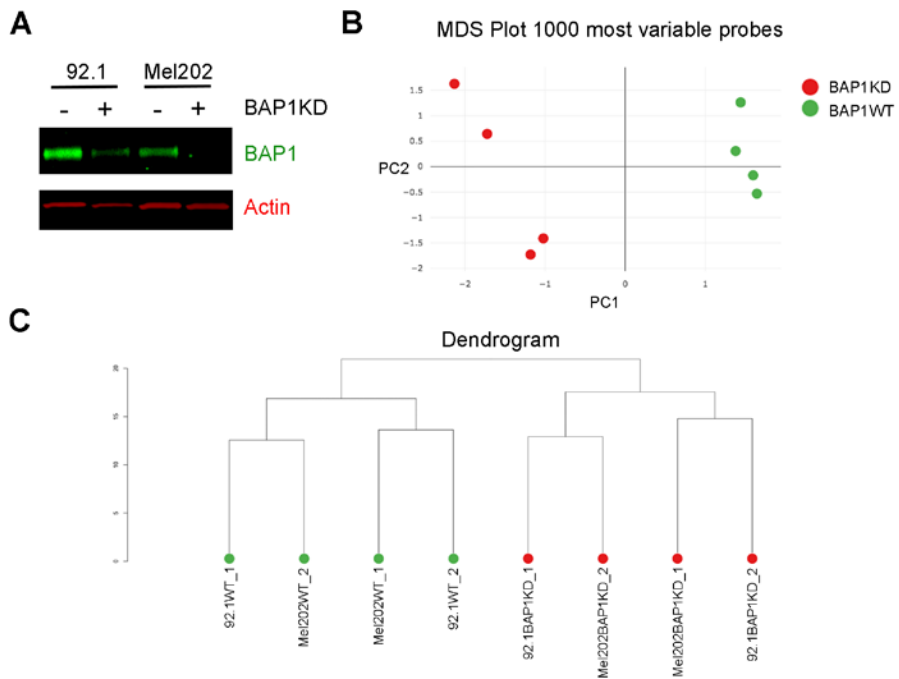

**Supplementary Figure S1.** BAP1 knockdown alters the epigenomic profile in uveal melanoma (UM) cells. (A) Western blot of tetracycline-inducible 92.1 and Mel202 shBAP1 UM cells without (-) and with (+) induction by doxycycline. (B) Multidimensional scaling (MDS) plot of the 1000 most variably methylated probes in the BAP1KD cell experiment, comparing the tetracycline-induced BAP1KD cells (BAP1KD, red) to the un-induced BAP1 control cells (BAP1WT, green). (C) Hierarchical clustering dendrogram, using all methylation probes, plotting the induced (BAP1KD) and uninduced (BAP1WT) 92.1 and Mel202 biological replicates.
